# Supplementary material
Source: ML conference proceedings conference paper supplement (https://openreview.net/forum?id=Jz98aDK5gMW)
Supplement: supplementary_material [file attachment]

---

# Bridging the Gap from Asymmetry Tricks to Decorrelation Principles in Non-contrastive Self-supervised Learning

---

## 1 A Proof of Lemma 3.2

2 *Proof of Lemma 3.2.* We can expand the loss (4), i.e.,

$$\mathcal{L} = \frac{1}{2} \mathbb{E}_x [\|W_p f^1 - \text{StopGrad}(f^2)\|^2]$$

3 as follows:

$$\begin{aligned} \mathcal{L} &= \frac{1}{2} \mathbb{E}_x [\text{tr}(W_p f^1 f^{1\top} W_p^\top) - 2\text{tr}(\text{StopGrad}(f^2) f^{1\top} W_p^\top) + \text{tr}(\text{StopGrad}(f^2) f^{2\top})] \\ &= \frac{1}{2} (\text{tr}(W_p \mathbb{E}_x[f^1 f^{1\top}] W_p^\top) - 2\text{tr}(\mathbb{E}_x[\text{StopGrad}(f^2) f^{1\top}] W_p^\top) + \text{tr}(\mathbb{E}_x[\text{StopGrad}(f^2) f^{2\top}])) \\ &= \frac{1}{2} (\text{tr}(W_p F^1 F^{1\top} W_p^\top) - 2\text{tr}(\text{StopGrad}(F^2) F^{1\top} W_p^\top) + \text{tr}(\text{StopGrad}(F^2) F^{2\top})). \end{aligned} \quad (20)$$

4 We used  $\mathbb{E}_x[f^1 f^{1\top}] = F^1 F^{1\top}$ ,  $\mathbb{E}_x[f^2 f^{1\top}] = F^2 F^{1\top}$ , and  $\mathbb{E}_x[f^2 f^{2\top}] = F^2 F^{2\top}$ .

5 Taking derivatives of  $\mathcal{L}$  with respect to  $W_p$  yields (7) since

$$\frac{\partial \mathcal{L}}{\partial W_p} = \frac{1}{2} (2W_p F^1 F^{1\top}) - F^2 F^{1\top} = W_p F^1 F^{1\top} - F^2 F^{1\top}. \quad (21)$$

6 Note that there is no gradient at  $\text{StopGrad}(\cdot)$ . Similarly, the derivative with respect to  $F^{1\top}$  is given  
7 by (8) since

$$\frac{\partial \mathcal{L}}{\partial F^1} = \frac{1}{2} (2W_p^\top W_p F^1) - W_p^\top F^2 = W_p^\top W_p F^1 - W_p^\top F^2. \quad (22)$$

8 □

## 9 B Proof of Lemma 3.3

10 *Proof of Lemma 3.3.* Assume the mapping from the input  $x \in \mathbb{R}^P$  to  $f \in \mathbb{R}^D$  is given by a linear  
11 transformation  $f = Wx$ . (Or maybe affine  $f = Wx + b$ .) We will use a ‘vectorized’ representation of  
12  $W = [w_1, \dots, w_D]^\top$  as  $w = [w_1^\top, \dots, w_D^\top]^\top \in \mathbb{R}^{DP}$ . Now, suppose we change  $w$  as  $w \rightarrow w + \delta w$ ,  
13 where we choose the gradient of  $L$  for  $\delta w$  as

$$\delta w = -\frac{\partial L}{\partial w}. \quad (23)$$

14 Then,  $f$  will change as  $f \rightarrow f + \delta f$  accordingly, where

$$\delta f = \frac{\partial f}{\partial w} \delta w = -\frac{\partial f}{\partial w} \frac{\partial L}{\partial w}. \quad (24)$$

15 Since  $w$  affects the loss  $L$  only through  $f$ , we use chain rule to get

$$\frac{\partial L}{\partial w} = \left( \frac{\partial f}{\partial w} \right)^\top \frac{\partial L}{\partial f}. \quad (25)$$

16 Thus, substituting this into (24) yields

$$\delta f = -\frac{\partial f}{\partial w} \left( \frac{\partial f}{\partial w} \right)^\top \frac{\partial L}{\partial f}. \quad (26)$$

17 Since  $f = [w_1^\top x, \dots, w_D^\top x]^\top$ ,

$$\frac{\partial f}{\partial w} = \begin{bmatrix} x^\top & & & \\ & x^\top & & \\ & & \ddots & \\ & & & x^\top \end{bmatrix} (\in \mathbb{R}^{D \times DP}) \quad (27)$$

18 Thus,

$$\frac{\partial f}{\partial w} \left( \frac{\partial f}{\partial w} \right)^\top = \begin{bmatrix} x^\top x & & & \\ & x^\top x & & \\ & & \ddots & \\ & & & x^\top x \end{bmatrix} = (x^\top x)I \quad (28)$$

19 Substituting this into (26) yields

$$\delta f = -\frac{\partial f}{\partial w} \left( \frac{\partial f}{\partial w} \right)^\top \frac{\partial L}{\partial f} = -(x^\top x) \frac{\partial L}{\partial f}. \quad (29)$$

20 This states that when we move  $w$  in the direction  $\delta w$  of minimizing  $L$ ,  $f$  moves in the direction of  $-\partial L/\partial f$ .

22 Next, we consider the effect of weight decay on  $w$ . Then  $\delta w$  becomes  $-\partial L/\partial w - \eta w$ . We consider  
23 the change  $\delta f'$  of  $f$  due to  $-\eta w$ . This is given by

$$\delta f' = \frac{\partial f}{\partial w} (-\eta w) \quad (30)$$

24 Using (27),

$$\delta f' = -\eta \begin{bmatrix} x^\top w_1 \\ x^\top w_2 \\ \vdots \\ x^\top w_D \end{bmatrix} = -\eta Wx = -\eta f \quad (31)$$

25 In conclusion, when we move  $w$  as  $w \rightarrow w - \partial L/\partial w - \eta w$ ,  $f$ 's change  $\delta f$  will be given by

$$\delta f = -(x^\top x) \frac{\partial L}{\partial f} - \eta f. \quad (32)$$

26 Supposing  $x$  to be an ImageNet image, we may think  $x^\top x \sim \text{const}$ . Assuming  $x^\top x = 1$ , the above  
27 leads to  $F' = -\partial L/\partial F - \eta F$ , which is (11).  $\square$

## 28 C Behavior of $W_p$ in Ours

29 We also examine how  $W_p$  changes in the optimization of our proposed method. Following the same  
30 experimental setting as Sec. 5, we train a linear predictor with  $W_p \in \mathbb{R}^{8192 \times 8192}$ . As shown in Fig. 3,  
31  $W_p$  approaches to a diagonal matrix during training process.

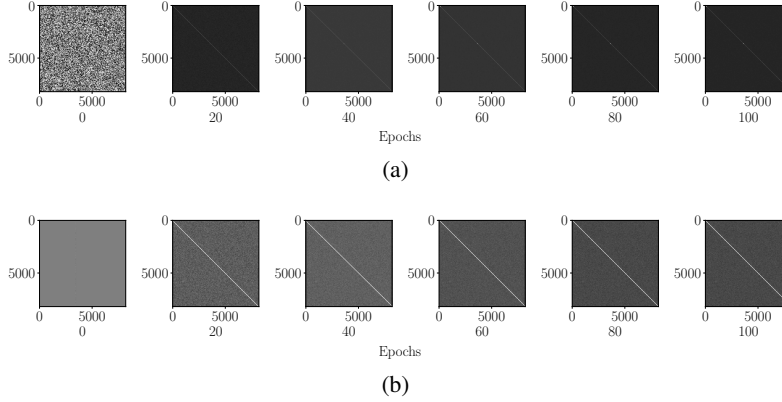

Figure 3: (a)  $W_p$  in our proposed method at different epochs of training time. (b) Normalized  $W_p$  for better visualization; each row of  $W_p$  is divided by its diagonal entry.

## 32 D More Results with a Broader Range of Configuration

Table 5 shows more results of our method with different configurations and hyperparameter settings.

Table 5: Results of our method on more configurations.

| PROJECTOR      | PREDICTOR | LR   | #PARTITION | INV COEF | COV COEF | ACC@1 |
|----------------|-----------|------|------------|----------|----------|-------|
| 4096-256       | 256       | 0.3  | 1          | 1        | 1        | 54.7  |
| 4096-256       | 256       | 0.3  | 1          | 10       | 1        | 56.8  |
| 4096-256       | 256       | 0.3  | 1          | 1        | 10       | 53.1  |
| 4096-256       | 256       | 0.3  | 8          | 10       | 1        | 63.8  |
| 4096-256       | 256       | 0.3  | 32         | 1        | 1        | 54.8  |
| 4096-256       | 256       | 0.3  | 32         | 10       | 1        | 63.7  |
| 2048-2048-2048 | 2048      | 0.3  | 1          | 1        | 0        | 50.9  |
| 2048-2048-2048 | 2048      | 0.3  | 1          | 1        | 1        | 61.4  |
| 2048-2048-2048 | 2048      | 0.3  | 1          | 1        | 25       | 60.6  |
| 2048-2048-2048 | 2048      | 0.3  | 1          | 25       | 1        | 60.1  |
| 2048-2048-2048 | 2048      | 0.3  | 1          | 25       | 25       | 63.4  |
| 2048-2048-2048 | 2048      | 0.3  | 8          | 25       | 1        | 67.3  |
| 2048-2048-2048 | 2048      | 0.3  | 8          | 25       | 25       | 66.2  |
| 2048-2048-2048 | 2048      | 0.3  | 32         | 10       | 1        | 66.6  |
| 2048-2048-2048 | 2048      | 0.3  | 32         | 25       | 1        | 67.3  |
| 2048-2048-2048 | 2048      | 0.3  | 32         | 50       | 1        | 67.2  |
| 2048-2048-2048 | 2048      | 0.45 | 1          | 1        | 1        | 63.9  |
| 2048-2048-2048 | 2048      | 0.45 | 1          | 25       | 25       | 64.7  |
| 2048-2048-2048 | 2048      | 0.45 | 32         | 10       | 1        | 64.3  |
| 8192-8192-8192 | 8192      | 0.3  | 8          | 25       | 8        | 69.0  |

33

## 34 E Standardization layer

35 Feature standardization is computed as following, independent to partitions:

$$Std(f_i) = \frac{f_i - \mu_{i, sync}}{\sigma_{i, sync}} \quad (33)$$

36 ,where  $f_i$  is the  $i$ th entry of  $f$ ,  $\mu_{i, sync}$  and  $\sigma_{i, sync}$  are synchronized  $i$ th entry of mean and deviation  
37 respectively among devices.

38 **F Pseudo-code of our proposed method**

---

**Algorithm 1** Our Proposed Method, PyTorch-like

---

```

# h: backbone + projector
# w: weight of predictor
# D: projector output size
# C_in, C_cov: coefficients
#
# In this pseudo-code, we assume number of partitions equals to
# number of gpus, and the following code is processed on a single
# gpu.
for x in loader:
    x1, x2 = aug1(x), aug2(x)
    f1, f2 = h(x1), h(x2)
    f1, f2 = std(f1), std(f2)

    # Processed by predictor
    p1, p2 = f1 @ w.T, f2 @ w.T
    inv_loss = (p1-f2).pow(2).mean() + (p2-f1).pow(2).mean()

    # Note: we do not collect cov from
    # different gpus
    wtw = w.T @ w
    n = p1.size(0) # Batch size per gpu
    cov1 = p1.T @ p1 / n
    cov2 = p2.T @ p2 / n
    cov_loss = (cov1-wtw).pow(2).sum() + (cov2-wtw).pow(2).sum()

    loss = C_in * inv_loss + C_cov / D * cov_loss
    loss.backward()
    update(f,w)

def std(f): # Standarization
    return SyncBN(affine=False)(f)

```

---
